# Supplementary material
Source: MDPI journal article supplement (https://www.mdpi.com/1999-4907/7/10/241)
Supplement: s1 [file s1]

Supplementary Materials: How Biotic Differentiation of Human Impacted Nutrient Poor Deciduous Forests Can Affect the Preservation Status of Mountain Forest Vegetation

Tomasz Durak and Roma Durak

**Table S1.** Changes in the frequency of occurrence of herbaceous plants between sampling periods. Only those species with frequencies changed by at least 10% are shown. For the groups composed of disappearing and of spreading species, the mean value of Ellenberg indicators (EIV) are given.

|  | **Frequency (%)** | | |  | **Mean EIV** | | | |
| --- | --- | --- | --- | --- | --- | --- | --- | --- |
|  | 1950s | 2000s | Δ |  | L | F | R | N |
| Decrease |  |  |  |  |  |  |  |  |
| *Maianthemum bifolium* | 38.9 | 22.2 | -16.7 |  |  |  |  |  |
| *Aposeris foetida* | 11.1 | 0.0 | -11.1 |  |  |  |  |  |
| *Geranium phaeum* | 11.1 | 0.0 | -11.1 |  |  |  |  |  |
| *Poa chaixii* | 11.1 | 0.0 | -11.1 |  |  |  |  |  |
| *Veronica chamaedrys* | 11.1 | 0.0 | -11.1 |  |  |  |  |  |
| *Hieracium murorum* | 16.7 | 5.6 | -11.1 |  |  |  |  |  |
| *Fragaria vesca* | 27.8 | 16.7 | -11.1 |  |  |  |  |  |
| *Melandrium rubrum* | 27.8 | 16.7 | -11.1 |  |  |  |  |  |
| *Scrophularia nodosa* | 27.8 | 16.7 | -11.1 |  |  |  |  |  |
| *Anemone nemorosa* | 33.3 | 22.2 | -11.1 |  |  |  |  |  |
| *Sedum fabaria* | 33.3 | 22.2 | -11.1 |  |  |  |  |  |
| *Solidago virgaurea* | 33.3 | 22.2 | -11.1 |  |  |  |  |  |
| *Carex pilosa* | 50.0 | 38.9 | -11.1 |  |  |  |  |  |
|  |  |  |  |  | 5.3 | 5.0 | 5.0 | 4.8 |
| Increase |  |  |  |  |  |  |  |  |
| *Mercurialis perennis* | 0.0 | 27.8 | 27.8 |  |  |  |  |  |
| *Rubus idaeus* | 5.6 | 33.3 | 27.8 |  |  |  |  |  |
| *Dryopteris filix-mas* | 11.1 | 38.9 | 27.8 |  |  |  |  |  |
| *Oxalis acetosella* | 11.1 | 33.3 | 22.2 |  |  |  |  |  |
| *Dentaria bulbifera* | 11.1 | 27.8 | 16.7 |  |  |  |  |  |
| *Calamagrostis arundinacea* | 5.6 | 22.2 | 16.7 |  |  |  |  |  |
| *Athyrium filix-femina* | 38.9 | 50.0 | 11.1 |  |  |  |  |  |
| *Aruncus sylvestris* | 5.6 | 16.7 | 11.1 |  |  |  |  |  |
| *Cardaminopsis halleri* | 5.6 | 16.7 | 11.1 |  |  |  |  |  |
| *Anthriscus nitida* | 0.0 | 11.1 | 11.1 |  |  |  |  |  |
| *Deschampsia caespitosa* | 0.0 | 11.1 | 11.1 |  |  |  |  |  |
| *Geranium robertianum* | 0.0 | 11.1 | 11.1 |  |  |  |  |  |
| *Impatiens noli-tangere* | 0.0 | 11.1 | 11.1 |  |  |  |  |  |
| *Lunaria rediviva* | 0.0 | 11.1 | 11.1 |  |  |  |  |  |
| *Primula elatior* | 0.0 | 11.1 | 11.1 |  |  |  |  |  |
| *Stachys sylvatica* | 0.0 | 11.1 | 11.1 |  |  |  |  |  |
| *Stellaria nemorum* | 0.0 | 11.1 | 11.1 |  |  |  |  |  |
| *Pulmonaria obscura* | 11.1 | 22.2 | 11.1 |  |  |  |  |  |
| *Symphytum cordatum* | 11.1 | 22.2 | 11.1 |  |  |  |  |  |
| *Galium odoratum* | 16.7 | 27.8 | 11.1 |  |  |  |  |  |
|  |  |  |  |  | 4.2 | 6.0 | 6.1 | 6.4 |

© 2016 by the authors. Submitted for possible open access publication under the
terms and conditions of the Creative Commons Attribution (CC-BY) license (http://creativecommons.org/licenses/by/4.0/).
